# Supplementary material for: Reduced graphene oxide as capturer of dyes and electrons during photocatalysis: surface wrapping and capture promoted efficiency
Source: Royal Society of Chemistry journal article supplement (doi:10.1039/c1cp20504h), 2011-01-01
Supplement: c1cp20504h.pdf [file c1cp20504h.pdf]

## Supporting Information for

### Reduced Graphene Oxide as Capturer of Dyes and Electrons during Photocatalysis: Surface Wrapping and Capture Promoted Efficiency

*Jinghai Liu<sup>1,2,3</sup>, Zhichao Wang<sup>1,2</sup>, Liwei Liu<sup>1</sup> and Wei Chen<sup>\*1</sup>*

<sup>1</sup>i-Lab, Suzhou Institute of Nano-Tech and Nano-Bionics, Chinese Academy of Sciences, 398 Ruoshui Road, Suzhou 215123, P. R. China, <sup>2</sup>Graduate University of Chinese Academy of Sciences, 19A Yuquanlu, Beijing 100049, P. R. China, and <sup>3</sup>Institute of Chemistry, Chinese Academy of Sciences, No.21st North Street Zhongguancun, Beijing 100190, P. R. China.

\*Corresponding author: Wei Chen, E-mail: [wchen2006@sinano.ac.cn](mailto:wchen2006@sinano.ac.cn) and Fax: (+86)-512-62603079

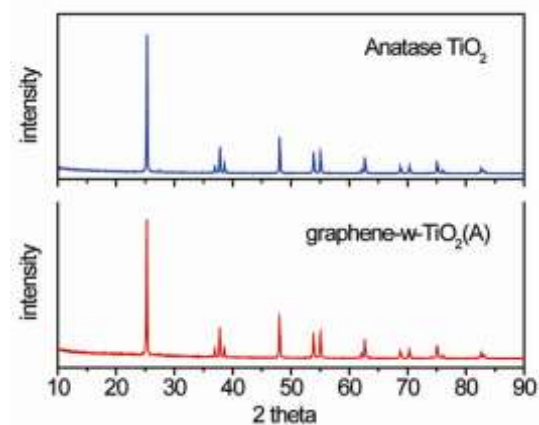

**Figure S1.** XRD pattern of graphene-w-TiO<sub>2</sub> and anatase TiO<sub>2</sub> control. Here, graphene-w-TiO<sub>2</sub> was referred as to graphene-w-TiO<sub>2</sub> (A) at the bottom.

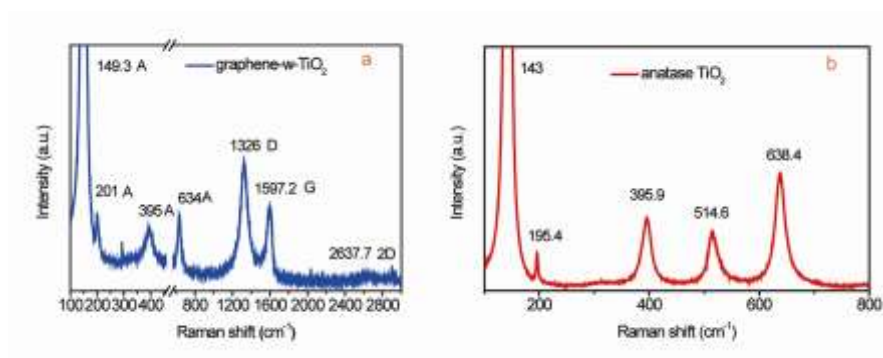

**Figure S2.** Raman spectra of graphene-w-TiO<sub>2</sub> and Anatase TiO<sub>2</sub> control. Exciting source: 635 nm laser.

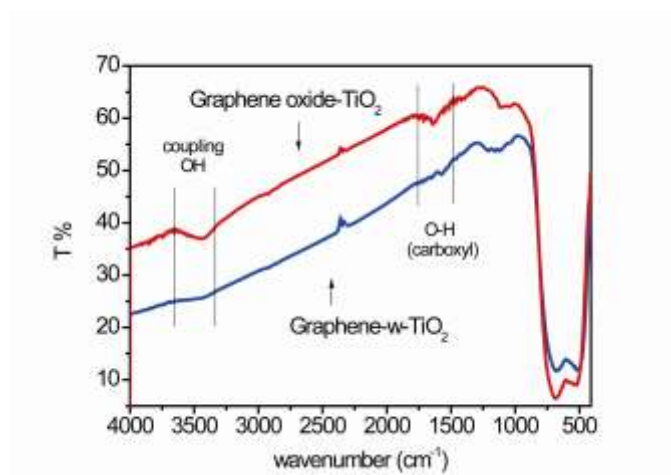

**Figure S3.** FTIR spectra of the Graphene-w-TiO<sub>2</sub> and Graphene oxide-TiO<sub>2</sub> (measured as KBr pellets).

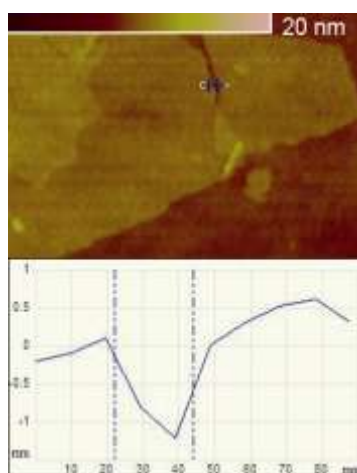

**Figure S4.** AFM image of graphene oxide, at the bottom is the typical height profile of exfoliated graphene oxide.

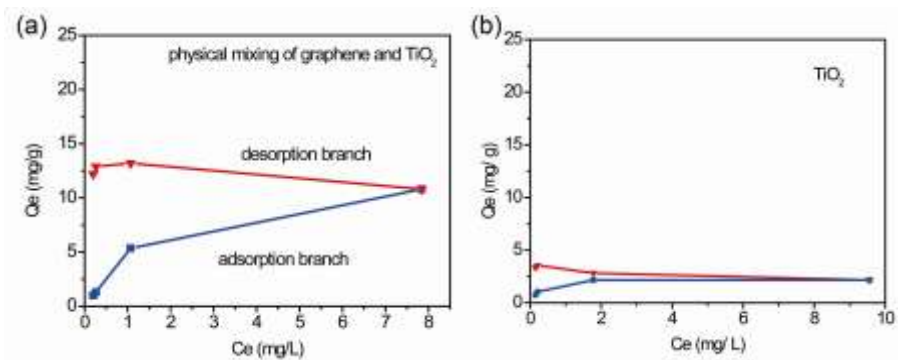

**Figure S5.** The adsorption-desorption isotherm of physical mixing of graphene and TiO<sub>2</sub> (a) and TiO<sub>2</sub> (b). MB: 10 mg/L, 50 mL. Photocatalyst: 10 mg.

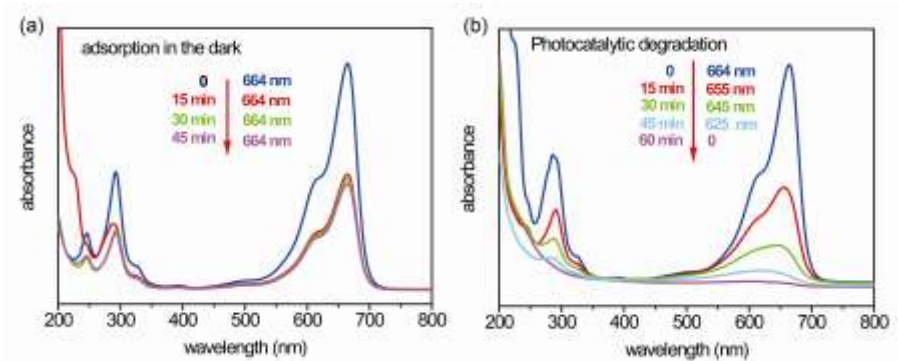

**Figure S6.** The change in optical absorption of MB solution: (a) the adsorption in the dark. (b) The photocatalytic degradation process.
